# Supplementary material
Source: ML conference proceedings conference paper supplement (https://openreview.net/forum?id=r6a21wSch9p)
Supplement: supplementary_material [file attachment]

## A METHODS

### A.1 NOTATION

| Symbol                    | Used for                                                                                                                                                                                                                                  |
|---------------------------|-------------------------------------------------------------------------------------------------------------------------------------------------------------------------------------------------------------------------------------------|
| $\mathbf{X}$              | A discretization of the domain $D$ , which is used to train the model.                                                                                                                                                                    |
| $\mathbf{X}'$             | A discretization of the domain $D$ , which is used to evaluate the model.                                                                                                                                                                 |
| $\mathbf{x}$              | Coordinate of spatial point in $D$ .                                                                                                                                                                                                      |
| $n_s$                     | Number of spatial points of seen meshes for training, as $ \mathbf{X}  = n_s$ .                                                                                                                                                           |
| $n'_s$                    | Number of spatial points of unseen meshes for inference, as $ \mathbf{X}'  = n'_s$ .                                                                                                                                                      |
| $n_t$                     | Number of input timestamps as number of input time-dependent PDE's initial states.                                                                                                                                                        |
| $n'_t$                    | Number of output timestamps as number of output time-dependent PDE's future states.                                                                                                                                                       |
| $a$                       | Input function, where $a \in \mathcal{A}(D; \mathbb{R}^{d_a})$ means for $\mathbf{x} \in D$ , $a(\mathbf{x}) \in \mathbb{R}^{d_a}$ . In time-dependent PDEs, $a = u(\cdot, \mathbf{T})$ , where $\mathbf{T} = \{t_i\}_{i=1}^{n_t}$ .      |
| $u$                       | Target function for approximation, where $u \in \mathcal{U}(D; \mathbb{R}^{d_u})$ means for $\mathbf{x} \in D$ , $u(\mathbf{x}) \in \mathbb{R}^{d_u}$ .                                                                                   |
| $v$                       | Representation function, where $v \in \mathcal{U}(D; \mathbb{R}^{d_v})$ means for $\mathbf{x} \in D$ , $v(\mathbf{x}) \in \mathbb{R}^{d_v}$ , which is a function obtained by a lifter which project $a$ into a higher dimensional space. |
| $\mathcal{G}_\theta$      | Approximation operator, where $\mathcal{G}_\theta(a) \approx u$ .                                                                                                                                                                         |
| $\mu$                     | The probability measure for sampling Spatial points $\mathbf{x}$ , which supported on $D$ .                                                                                                                                               |
| $\mathcal{C}$             | Cost functional as the minimum optimization target.                                                                                                                                                                                       |
| $\mathcal{F}$             | Discrete Fourier transform for equispaced spatial points.                                                                                                                                                                                 |
| $\mathcal{F}^{-1}$        | Discrete Inverse Fourier transform for equispaced spatial points.                                                                                                                                                                         |
| $P$                       | Project operator, with $P(a)(\mathbf{x}) \in \mathbb{R}^{d_v}$ .                                                                                                                                                                          |
| $Q$                       | Project operator, with $Q(v)(\mathbf{x}) \in \mathbb{R}^{d_u}$ .                                                                                                                                                                          |
| $v^t$                     | t-th iterative representation function after kernel operators' update.                                                                                                                                                                    |
| $\mathcal{K}_\phi$        | Kernel integral operator mapping, which maps $a$ to a bounded linear operator, with parameter $\phi$ .                                                                                                                                    |
| $W$                       | Linear transform on the $d_v$ dimension (channel) of $v(\mathbf{x}) \in d_v$ .                                                                                                                                                            |
| $R_\phi$                  | Fourier transform of a periodic kernel function, which is learnable parameters in a single iterative process in FNO.                                                                                                                      |
| ChannelMix                | Channel-mixing operator as a linear transform in the dimension of channel ( $d_v$ ).                                                                                                                                                      |
| TokenMix                  | Token-mixing operator as a linear transform in the dimension of spatial points ( $n_s$ ).                                                                                                                                                 |
| $\tilde{\mathcal{F}}$     | Proposed non-equispaced Fourier transform, where $\tilde{\mathcal{F}} = (\mathcal{F} \circ \mathcal{H}(a))$ .                                                                                                                             |
| $m_s$                     | Spatial points' number on resampled equi-spaced points.                                                                                                                                                                                   |
| $\mathcal{H}$             | Interpolation operator to interpolate the non-equispaced spatial points on equispaced spatial grids.                                                                                                                                      |
| $\tau$                    | Parameter in Gaussian interpolation kernels controlling smoothness of the kernel.                                                                                                                                                         |
| $\mu$                     | Parameter in Gaussian interpolation kernels, as the mean of Gaussian kernels                                                                                                                                                              |
| $\mathcal{H}_\eta$        | Interpolation operator mapping, where $\mathcal{H}_\eta(a)$ is a interpolation operator used to map signals on the non-equispaced spatial points to equispaced spatial grids.                                                             |
| $\mathcal{H}'_\zeta$      | Interpolation operator mapping, where $\mathcal{H}'_\zeta(a)$ is a interpolation operator used to map signals on the equispaced spatial points to non-equispaced spatial grids.                                                           |
| $\mathcal{N}(\mathbf{x})$ | Neighborhood of spatial point $\mathbf{x}$ .                                                                                                                                                                                              |

Table A1: Glossary of Notations used in this paper.

## A.2 GRAPH CONSTRUCTION

**Neighborhood construction.** Instead of using K-nearest neighborhood method, the neighborhood system in the interpolation layer is constructed by  $\epsilon$ -ball, because in equispace scenarios, there will be multiple points as K-th nearest neighbor at the same time. For point  $\mathbf{x}$ , its neighbor is defined according to

$$\begin{cases} d(\mathbf{x}, \mathbf{x}_i) \leq \epsilon & \mathbf{x}_i \in \mathcal{N}(\mathbf{x}); \\ d(\mathbf{x}, \mathbf{x}_i) > \epsilon & \mathbf{x}_i \notin \mathcal{N}(\mathbf{x}). \end{cases} \quad (11)$$

For given  $c$  defined in Sec. 3.2, we can restrict  $\epsilon$  so that  $\mathbb{E}_{\mathbf{x} \sim \mu}[|\mathcal{N}(\mathbf{x})|] < c \log(n_s)$ .

## A.3 PROOF OF THEOREM 3.1.

Our proof is mostly based on Chen & Chen (1995) and Kovachki et al. (2021). For notation simplicity, in the proof, we directly write  $\mathcal{H}_\eta(a)$  as  $\mathcal{H}_\eta$  as the linear operator.

**Lemma A1.** *Let  $\mathcal{X}$  be a Banach space, and  $\mathcal{U} \subseteq \mathcal{X}$  a compact set, and  $\mathcal{K} \subset \mathcal{X}$  a dense set. Then, for any  $\epsilon > 0$ , there exists a number  $n \in \mathbb{N}$ , and a series of continuous, linear functionals  $G_1, G_2, \dots, G_n \in C(\mathcal{U}; \mathbb{R})$ , and elements  $\varphi_1, \dots, \varphi_n \in \mathcal{K}$ , such that*

$$\sup_{u \in \mathcal{U}} \|v - \sum_{j=1}^n G_j(v) \varphi_j\|_{\mathcal{X}} \leq \epsilon \quad (12)$$

The proof is given in **Lemma 7.** in Kovachki et al. (2021), and **Theorem 3.** and **4.** for reference .

**Theorem A2.** *Let  $D \subseteq \mathbb{R}^d$  be compact domain. Let  $\mathcal{U}$  be a separable Banach space of real-valued functions on  $D$ , such that  $C(D, \mathbb{R}) \subseteq \mathcal{U}$  is dense. Suppose  $\mathcal{U} = L^p(D; \mathbb{R})$  for any  $1 < p < \infty$ .  $\nu$  is a probability measure supported on  $\mathcal{U}$  and assume that,  $\mathbb{E}_{v \sim \nu} \|v\|_{\mathcal{U}} < \infty$  for any  $v \in \mathcal{U}$ .  $\mu$  is a probabilistic measure supported on  $D$ , which defines the inner product of Hilbert space  $\mathcal{U}$  as  $\langle f, g \rangle_{\mathcal{U}} = \int_D f(\mathbf{x})g(\mathbf{x})d\mu(\mathbf{x})$ . Then, there exists a neural network  $h_\eta : \mathbb{R}^d \times \mathbb{R}^d \rightarrow \mathbb{R}$  whose activation functions are of the Tauber-Wiener class, such that*

$$\|v - \mathcal{H}(v)\|_{\mathcal{U}} \leq \epsilon,$$

where  $\mathcal{H}(v)(\mathbf{x}) = \int_D h_\eta(\mathbf{x}, \mathbf{y})v(\mathbf{y})d\mu(\mathbf{y})$ .

*Proof.* Since  $\mathcal{U}$  is a Polish space, we can find a compact set  $\mathcal{K}$ , such that  $\nu(\mathcal{U} \setminus \mathcal{K}) \leq \epsilon$ . Therefore, **Lemma A1** can be applied, to find a number  $n \in \mathbb{N}$ , a series of continuous linear functionals  $G_j \in C(\mathcal{U}; \mathbb{R})$  and functions  $\varphi_j \in C(D; \mathbb{R})$  such that

$$\sup_{v \in \mathcal{K}} \|v - \sum_{j=1}^n G_j(v) \varphi_j\|_{\mathcal{U}} \leq \epsilon$$

Denote  $\hat{\mathcal{H}}_n(v) = \sum_{j=1}^n G_j(v) \varphi_j$ , and let  $1 < q < \infty$  be the Hölder conjugate of  $p$ . Since  $\mathcal{U} = L^p(D; \mathbb{R})$ , by Riesz Representation Theorem, there exists functions  $g_j \in L^q(D; \mathbb{R})$ , such that  $G_j(v) = \int_D v(\mathbf{x})g_j(\mathbf{x})d\mu(\mathbf{x})$  for  $j = 1, \dots, n$  and  $v \in L^p(D; \mathbb{R})$ . By density of  $C(D; \mathbb{R})$  in  $L^q(D; \mathbb{R})$ , we can find functions  $\psi_1, \dots, \psi_n \in C(D; \mathbb{R})$ , such that

$$\sup_{j \in \{1, \dots, n\}} \|\psi_j - g_j\|_{L^q(D; \mathbb{R})} \leq \epsilon/n.$$

Then, we define  $\tilde{\mathcal{H}}_n : L^p(D; \mathbb{R}) \rightarrow C(D; \mathbb{R})$  by

$$\tilde{\mathcal{H}}_n(v) = \sum_{j=1}^n \int_D \psi_j(\mathbf{y})v(\mathbf{y})d\mu(\mathbf{y})\varphi_j(\mathbf{x})$$

For the universal approximation (density) (Hornik et al., 1989) of neural network, we can find a Multi-layer Feedforward network  $h_\eta : \mathbb{R}^d \times \mathbb{R}^d \rightarrow \mathbb{R}$  whose activation functions are of the Tauber-Wiener class, such that

$$\sup_{\mathbf{x}, \mathbf{y} \in D} |h_\eta(\mathbf{x}, \mathbf{y}) - \sum_{j=1}^n \psi_j(\mathbf{y})\varphi_j(\mathbf{x})| \leq \epsilon$$

Let  $\mathcal{H}_\eta(\mathbf{x}) = \int_D h_\eta(\mathbf{x}, \mathbf{y}) v(\mathbf{y}) d\mu(\mathbf{y})$ . Then, there exists a constant  $C_1 > 0$ , such that

$$\|\hat{\mathcal{H}}_n(v) - \mathcal{H}(v)\|_{L^p(D; \mathbb{R})} \leq C_1 (\|\hat{\mathcal{H}}_n(v) - \tilde{\mathcal{H}}_n(v)\|_{L^p(D; \mathbb{R})} + \|\tilde{\mathcal{H}}_n(v) - \mathcal{H}(v)\|_{L^p(D; \mathbb{R})})$$

For the first term, there is a constant  $C_2 > 0$ , such that

$$\begin{aligned} \|\hat{\mathcal{H}}_n(v) - \tilde{\mathcal{H}}_n(v)\|_{L^p(D; \mathbb{R})} &\leq C_2 \sum_{j=1}^n \left\| \int_D v(\mathbf{y}) (g_j(\mathbf{y}) - \psi_j(\mathbf{y})) d\mu(\mathbf{y}) \varphi_j \right\|_{L^p(D; \mathbb{R})} \\ &\leq C_2 \sum_{j=1}^n \|v(\mathbf{y})\|_{L^p(D; \mathbb{R})} \|g_j(\mathbf{y}) - \psi_j(\mathbf{y})\|_{L^q(D; \mathbb{R})} \|\varphi_j\|_{L^p(D; \mathbb{R})} \\ &\leq C_3 \epsilon \|v(\mathbf{y})\|_{L^p(D; \mathbb{R})} \end{aligned}$$

for some  $C_3 > 0$ . And for the second term,

$$\begin{aligned} \|\tilde{\mathcal{H}}_n(v) - \mathcal{H}(v)\|_{L^p(D; \mathbb{R})} &= \left\| \int_D v(\mathbf{y}) \left( \sum_{j=1}^n \psi_j(\mathbf{y}) \varphi_j(\cdot) - h_\eta(\cdot, \mathbf{y}) \right) d\mu(\mathbf{y}) \right\|_{L^p(D; \mathbb{R})} \\ &\leq |D| \epsilon \|v\|_{L^p(D; \mathbb{R})} \end{aligned}$$

Therefore, there is a constant  $C > 0$ , such that

$$\int_{\mathcal{U}} \|\hat{\mathcal{H}}_n(v) - \tilde{\mathcal{H}}_n(v)\|_{\mathcal{U}} d\nu(v) \leq \epsilon C \mathbb{E}_{v \sim \nu} \|v\|_{\mathcal{U}}$$

Because of the assumption that  $\mathbb{E}_{v \sim \nu} \|v\|_{\mathcal{U}} < \infty$ , and  $\epsilon$  is arbitrary, then

$$\|v - \mathcal{H}(v)\|_{\mathcal{U}} \leq \|v - \hat{\mathcal{H}}_n(v)\|_{\mathcal{U}} + \|\hat{\mathcal{H}}_n(v) - \mathcal{H}(v)\|_{\mathcal{U}},$$

the proof is complete.  $\square$

**Corollary A3.** Define  $\mathcal{H}_\eta(v) = \int_D h_\eta(\mathbf{x} - \mathbf{y}, \mathbf{x}, a(\mathbf{y})) v(\mathbf{y}) d\mu(\mathbf{y})$ , the interpolation operator can also approximate  $v$  to any precision  $\epsilon$ .

*Proof.* We use a one-layer neural network  $h_\eta : D \times D \rightarrow \mathbb{R}$  as an example, which is defined as  $h_\eta(\mathbf{x}, \mathbf{y}, a(\mathbf{y})) = \sigma(\sum_{i=1}^d w_{x,i} x^{(i)} + w_{y,i} y^{(i)} + b)$ . We can rewrite it as

$$h_\eta = \sigma\left(\sum_{i=1}^d w_{x,i} (x^{(i)} - y^{(i)}) + (w_{y,i} + w_{x,i}) y^{(i)} + \sum_{j=1}^{d_a} w_{a,j} a^{(j)}(\mathbf{y}) + b\right),$$

where  $w_{a,j} = 0$ .  $\square$

**Corollary A4.** The *Theorem A2* and *Corollary A3* can be extended for  $v : D \rightarrow \mathbb{R}^{d_v}$ , where  $d_v > 1$ .

*Proof.* As  $v = (v^{(1)}, v^{(2)}, \dots, v^{(d_v)})$ , for each  $v^{(j)}$ , a single neural network can be used for approximation. Moreover, in implementation, we make  $h_\eta$  fully-connected, to improve the expressivity.  $\square$

**Remark.** As  $\sum_{\mathbf{x}_i \in \mathbf{X}} v(\mathbf{x}_i) h_\eta(\mathbf{x} - \mathbf{x}_i, \mathbf{x}_i, a(\mathbf{x}_i))$  is the unbiased estimation of  $\mathbb{E}_{\mathbf{y} \sim \mu} (h_\eta(\mathbf{x}, \mathbf{y}) v(\mathbf{y}))$ , we use the Equation. (8) for the approximation.

## B EXPERIMENTS

### B.1 BENCHMARK METHOD DESCRIPTION

**Vision Mixers.** We provide a framework for vision mixers as PDE solvers, including VIT, MLP-MIXER, FNET, GFN, FNO, PFNO and our NFS. The intermediate architecture of mixing layers is shown in Fig. B1. The code of our framework will be released soon. And the resampling and back-sampling methods are stacked before ‘Equispaced Input’ and ‘Equispaced Output’. In this way, the description of the Vision Mixers included in our framework can be described by different modules, as shown in Table. B1. All the trials on Vision Mixers set *embedding size* as 32, *batch size* as 4, *layer number* of the intermediate equispaced mixing layers as 2. In FNO and PFNO, the truncated  $K_{\max}$  is set as 16. The *patch size* of Vision Mixers with patchwise embedding are set as [4, 2] in 1-d PDEs and [4, 4, 2] in 2-d PDEs. The interpolation layers in NFS are composed of one layer of feed-forward network whose perceptron unit is equal to  $4 \times \text{embedding size}$  of the model.

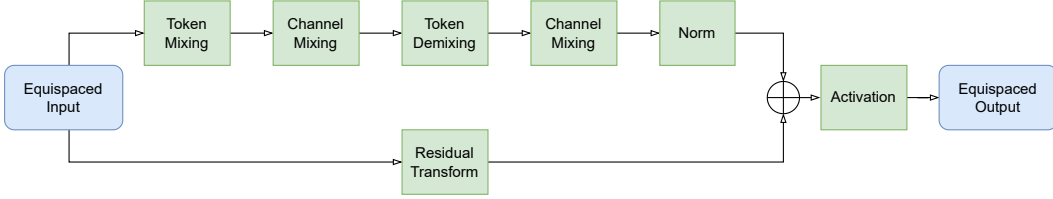

Figure B1: The architecture of Vision Mixers.

Table B1: Description of Vison Mixers in the unifying framework module by module.

| Modules        | VIT                 | MLPMIXER            | FNET                | GFN                 | FNO                       | PFNO                      | NFS                       |
|----------------|---------------------|---------------------|---------------------|---------------------|---------------------------|---------------------------|---------------------------|
| Resampling     | Patchwise Embedding | Patchwise Embedding | Patchwise Embedding | Patchwise Embedding | Identity                  | Patchwise Embedding       | Interpolation             |
| Token Mixing   | Attention           | MLP                 | Fourier             | Fourier             | Fourier                   | Fourier                   | Fourier                   |
| Channel Mixing | Linear              | Linear              | Linear              | Elementwise Product | Low Frequency MatMultiply | Low Frequency MatMultiply | Low Frequency MatMultiply |
| Token Demixing | Identity            | Identity            | Identity            | Inverse Fourier     | Inverse Fourier           | Inverse Fourier           | Inverse Fourier           |
| Channel Mixing | Identity            | Identity            | Identity            | Linear              | Identity                  | Identity                  | Identity                  |
| Normalization  | LayerNorm           | LayerNorm           | Complex LayerNorm   | LayerNorm           | Identity                  | LayerNorm                 | LayerNorm                 |
| Residual       | Identity            | Identity            | Identity            | Identity            | 1x1 Conv                  | 1x1 Conv                  | 1x1 Conv                  |
| Activation     | Gelu                | Gelu                | Complex Gelu        | Gelu                | Gelu                      | Gelu                      | Gelu                      |
| Back Sampling  | Linear+ Rearrange   | Linear+ Rearrange   | Linear+ Rearrange   | Linear+ Rearrange   | Identity                  | Linear+ Rearrange         | Interpolation             |

**Graph Spatio-Temporal Models.** The evaluated graph spatio-temporal neural networks are based on recurrent neural network for dynamics modeling, where the spatial dependency is modeled by graph neural networks. The spatial and temporal modules for AGCRN, DCRNN and GCGRU are shown in Table. B2. MPPDE used different architecture, with the pushforward trick used for taining, with *rolling* equaling 1 and *time window* equaling to 10 . All the trials on these graph spatio-temporal models set *embedding size* as 64, except MPPDE as 128. *Batch size* is set as 4. When the graph convolution needs multi-hop message-passing, we set the hop as 2. For MPPDE, the layer number of GNNs is 6. The *embedding dimension* in AGCRN is set as 2.

Table B2: Description of different graph spatio-temporal models

| Methods                 | Spatial module                     | Temporal module |
|-------------------------|------------------------------------|-----------------|
| GCGRU Seo et al. (2016) | Cheb Conv Defferrard et al. (2017) | GRU             |
| DCRNN Li et al. (2018)  | Diff Conv Atwood & Towsley (2016)  | GRU             |
| AGCRN Bai et al. (2020) | Node Similarity Bai et al. (2020)  | GRU             |

## B.2 DATA GENERATION

**Burgers' Equation.** The initial condition  $u_0(x)$  is generated according to  $u_0 \sim N(0.625(-\Delta + 25I)^{-2})$  with periodic boundary conditions.  $\nu$  is set as 0.01.  $x \in [0, 1]$  and  $t \in [0, 1]$ . The spatial resolution is 1024, and time resolution is 200. The dataset generation follows FNO's protocol, which can be downloaded from its source code on official Github.

**KdV Equation.** The equation is written as

$$\partial_t u(x, t) + 3\partial_x u^2(x, t) + \partial_x^3 u(x, t) = 0, \quad (13)$$



where  $x \in [0, 1]$ . The initial condition  $u_0(x)$  is calculated as

$$u(x, 0) = \sum_{i=1}^K 0.5c_i \cos(0.5\sqrt{c_i + b_i}x - a_i)$$

where  $c_i \sim N(0, \sigma_i)$ , and  $a_i, b_i > 0$ . The spatial resolution is 1024. The dataset is generated by `scipy` package, with `fftpack.diff` used as pseudo-differential method and `odeint` used as forward Euler method.

**Darcy Flow.** The equation is written as

$$\begin{aligned} -\nabla(a(\mathbf{x})\nabla u(\mathbf{x})) &= f(\mathbf{x}) & \mathbf{x} &\in (0, 1)^2 \\ u(\mathbf{x}) &= 0 & \mathbf{x} &\in \partial[0, 1]^2 \end{aligned} \quad (14)$$

The original resolution is  $256 \times 256$ .  $a(\mathbf{x})$  is generated by Gaussian random field, and we directly establish the operator to learn the mapping of  $a$  to  $u$ .

**NS Equation.** Our generation of NS Equation is based on FNO’s Appendix. A.3.3, with the forcing is kept fixed. The original spatial resolution is  $128 \times 128$ , and time resolution is 200.

### B.3 COMPLETE RESULTS ON MODEL COMPARISON

Here we give complete results on the four Equations. Table. B3 give the performance comparison on Darcy flow of both equispaced and non-equispaced scenarios. Table. B4 and B5 gives performance comparison in equispaced scenarios on the other three time-dependent problems. Table. B6 and B7 gives performance comparison in non-equispaced scenarios on the other three time-dependent problems. In all the tasks except `Darcy Flow`, the depth of layer is set as 2, and  $k_{\max} = 16$  in both NFS and FNO. However, we find in `Darcy Flow`,  $k_{\max}$  should be set much larger, or the loss will not decrease. In the reported results,  $k_{\max} = 32, 64, 128$  in `Darcy Flow`.

Table B3: Performance comparison on Darcy Flow.

|          | MAE( $\times 10^{-3}$ )        | RMSE( $\times 10^{-3}$ )   | MAE( $\times 10^{-3}$ )        | RMSE( $\times 10^{-3}$ )   | MAE( $\times 10^{-3}$ )         | RMSE( $\times 10^{-3}$ )   |
|----------|--------------------------------|----------------------------|--------------------------------|----------------------------|---------------------------------|----------------------------|
|          | Darcy Flow<br>( $r = 64$ )     |                            | Darcy Flow<br>( $r = 128$ )    |                            | Darcy Flow<br>( $r = 256$ )     |                            |
| VIT      | 0.5073 $\pm$ 0.0411            | 0.8468 $\pm$ 0.0432        | 0.9865 $\pm$ 0.0002            | 1.6195 $\pm$ 0.0007        | 1.1078 $\pm$ 0.0021             | 1.8444 $\pm$ 0.0023        |
| MLPMIXER | 0.4970 $\pm$ 0.0021            | 0.8228 $\pm$ 0.0034        | 0.8909 $\pm$ 0.0099            | 1.4221 $\pm$ 0.0118        | 0.9125 $\pm$ 0.0024             | 1.6459 $\pm$ 0.0032        |
| GFN      | 0.4739 $\pm$ 0.0016            | 0.8345 $\pm$ 0.0019        | 0.8659 $\pm$ 0.0046            | 1.4237 $\pm$ 0.0071        | 0.9618 $\pm$ 0.0124             | 1.6139 $\pm$ 0.0128        |
| FNO      | 0.4289 $\pm$ 0.0051            | 0.7740 $\pm$ 0.0046        | 0.7086 $\pm$ 0.0045            | 0.1324 $\pm$ 0.0019        | 0.9075 $\pm$ 0.0051             | 1.4940 $\pm$ 0.0046        |
| NFS      | <b>0.1497</b> $\pm$ 0.0005     | <b>0.1962</b> $\pm$ 0.0007 | <b>0.2254</b> $\pm$ 0.0007     | <b>0.7245</b> $\pm$ 0.0009 | <b>0.4216</b> $\pm$ 0.0033      | <b>0.8578</b> $\pm$ 0.0041 |
|          | Darcy Flow<br>( $n_s = 1024$ ) |                            | Darcy Flow<br>( $n_s = 4096$ ) |                            | Darcy Flow<br>( $n_s = 16384$ ) |                            |
| DCRNN    | 1.8146 $\pm$ 0.0060            | 2.6352 $\pm$ 0.0029        | 1.7629 $\pm$ 0.0003            | 2.5760 $\pm$ 0.0001        | OOM                             | OOM                        |
| AGCRN    | 1.6938 $\pm$ 0.0001            | 2.4440 $\pm$ 0.0001        | 1.7336 $\pm$ 0.0001            | 2.4167 $\pm$ 0.0001        | OOM                             | OOM                        |
| GCGRU    | 1.7633 $\pm$ 0.0001            | 2.5696 $\pm$ 0.0001        | 1.7403 $\pm$ 0.0001            | 2.5363 $\pm$ 0.0001        | OOM                             | OOM                        |
| MPPDE    | 0.6673 $\pm$ 0.0009            | 0.9290 $\pm$ 0.0012        | 0.5608 $\pm$ 0.0053            | 0.8424 $\pm$ 0.0051        | 0.6384 $\pm$ 0.0005             | 0.8748 $\pm$ 0.0005        |
| NFS      | <b>0.1727</b> $\pm$ 0.0047     | <b>0.2311</b> $\pm$ 0.0066 | <b>0.1430</b> $\pm$ 0.0007     | <b>0.1914</b> $\pm$ 0.0014 | <b>0.2379</b> $\pm$ 0.0007      | <b>0.3489</b> $\pm$ 0.0009 |

NFS fails to model the non-equispaced Burgers’ Equation when  $n_t$  is set as 1, in which the performance is far from it can achieve in equispaced scenarios. Such problem will be our future work.

Table B4: Performance comparison with Vision Mixer benchmarks on different equations ( $n_t = 1$ ). Validation loss on Burgers' ( $n_t = 1$ ) of VIT, GFN, and FNO does not converge. The results show that the early-stopping occurs in the beginning of training.

|               | MAE ( $\times 10^{-3}$ )          | RMSE ( $\times 10^{-3}$ )   | MAE ( $\times 10^{-3}$ )          | RMSE ( $\times 10^{-3}$ )  | MAE ( $\times 10^{-3}$ )           | RMSE ( $\times 10^{-3}$ )  |
|---------------|-----------------------------------|-----------------------------|-----------------------------------|----------------------------|------------------------------------|----------------------------|
| Vision Mixers | Burgers' ( $r = 512, n'_t = 10$ ) |                             | Burgers' ( $r = 512, n'_t = 40$ ) |                            | Burgers' ( $r = 1024, n'_t = 20$ ) |                            |
| VIT           | 201.6539 $\pm$ 0.5284             | 231.9138 $\pm$ 0.8403       | 183.6696 $\pm$ 0.3015             | 210.6237 $\pm$ 0.6767      | 195.5858 $\pm$ 0.7706              | 224.4712 $\pm$ 1.2472      |
| MLPMIXER      | 201.6547 $\pm$ 0.0671             | 231.9163 $\pm$ 0.0263       | 183.6535 $\pm$ 0.0599             | 210.6160 $\pm$ 0.0305      | 195.5960 $\pm$ 0.0240              | 224.4791 $\pm$ 0.0132      |
| GFN           | 201.6557 $\pm$ 0.9513             | 231.9122 $\pm$ 0.9535       | 183.6674 $\pm$ 0.4893             | 210.6165 $\pm$ 0.4831      | 195.5918 $\pm$ 0.0471              | 224.4736 $\pm$ 0.0681      |
| FNO           | 201.6527 $\pm$ 1.1415             | 231.9119 $\pm$ 1.6747       | 183.6696 $\pm$ 0.3015             | 210.6299 $\pm$ 0.4983      | 195.5902 $\pm$ 0.9304              | 224.4723 $\pm$ 0.9230      |
| NFS           | <b>0.1806</b> $\pm$ 0.0005        | <b>0.2669</b> $\pm$ 0.0010  | <b>0.3570</b> $\pm$ 0.0008        | <b>0.5340</b> $\pm$ 0.0009 | <b>0.4344</b> $\pm$ 0.0014         | <b>0.6092</b> $\pm$ 0.0017 |
|               | KdV ( $r = 512, n'_t = 10$ )      |                             | KdV ( $r = 512, n'_t = 40$ )      |                            | KdV ( $r = 1024, n'_t = 20$ )      |                            |
| VIT           | 0.2808 $\pm$ 0.0006               | 0.3938 $\pm$ 0.0009         | 0.3428 $\pm$ 0.0012               | 0.6832 $\pm$ 0.0016        | 0.3066 $\pm$ 0.0003                | 0.5461 $\pm$ 0.0003        |
| MLPMIXER      | 0.2732 $\pm$ 0.0054               | 0.4259 $\pm$ 0.0088         | <b>0.3336</b> $\pm$ 0.0045        | <b>0.5923</b> $\pm$ 0.0081 | 0.2872 $\pm$ 0.0005                | 0.5235 $\pm$ 0.0006        |
| GFN           | 0.2587 $\pm$ 0.0032               | 0.3490 $\pm$ 0.0056         | 0.3086 $\pm$ 0.0223               | 0.5952 $\pm$ 0.0338        | 0.2011 $\pm$ 0.0074                | 0.3464 $\pm$ 0.0063        |
| FNO           | 0.2619 $\pm$ 0.0069               | 0.3849 $\pm$ 0.0107         | 0.5608 $\pm$ 0.0053               | 0.8424 $\pm$ 0.0051        | 0.3925 $\pm$ 0.0079                | 0.4623 $\pm$ 0.0087        |
| NFS           | <b>0.2514</b> $\pm$ 0.0008        | <b>0.3776</b> $\pm$ 0.00011 | 0.4522 $\pm$ 0.0013               | <b>0.6290</b> $\pm$ 0.0022 | <b>0.2254</b> $\pm$ 0.0007         | <b>0.0745</b> $\pm$ 0.0010 |
|               | NS ( $r = 64, n'_t = 10$ )        |                             | NS ( $r = 64, n'_t = 40$ )        |                            | NS ( $r = 128, n'_t = 20$ )        |                            |
| VIT           | 9.3797 $\pm$ 0.0421               | 12.9291 $\pm$ 0.0703        | 22.8565 $\pm$ 0.0935              | 29.1130 $\pm$ 0.1428       | 15.7398 $\pm$ 0.0757               | 20.6927 $\pm$ 0.0664       |
| MLPMIXER      | 7.5246 $\pm$ 0.0080               | 10.4762 $\pm$ 0.0096        | 15.8632 $\pm$ 0.0375              | 20.1522 $\pm$ 0.0604       | 14.9360 $\pm$ 0.0305               | 19.3268 $\pm$ 0.0635       |
| GFN           | 3.5524 $\pm$ 0.0057               | 4.7071 $\pm$ 0.0088         | 10.2250 $\pm$ 0.0331              | 13.0451 $\pm$ 0.0704       | 6.3976 $\pm$ 0.00345               | 8.2685 $\pm$ 0.297         |
| FNO           | 3.3425 $\pm$ 0.0007               | 5.2566 $\pm$ 0.0008         | 8.9857 $\pm$ 0.0010               | 14.0171 $\pm$ 0.0023       | 4.4627 $\pm$ 0.0004                | 6.3047 $\pm$ 0.0004        |
| NFS           | <b>1.7425</b> $\pm$ 0.0017        | <b>2.2847</b> $\pm$ 0.0022  | <b>4.7882</b> $\pm$ 0.0066        | <b>6.1508</b> $\pm$ 0.0042 | <b>2.6988</b> $\pm$ 0.0005         | <b>3.5121</b> $\pm$ 0.0006 |

Table B5: Performance comparison with Vision Mixer benchmarks on different equations ( $n_t = 10$ ).

|               | MAE ( $\times 10^{-3}$ )          | RMSE ( $\times 10^{-3}$ )  | MAE ( $\times 10^{-3}$ )          | RMSE ( $\times 10^{-3}$ )  | MAE ( $\times 10^{-3}$ )           | RMSE ( $\times 10^{-3}$ )  |
|---------------|-----------------------------------|----------------------------|-----------------------------------|----------------------------|------------------------------------|----------------------------|
| Vision Mixers | Burgers' ( $r = 512, n'_t = 10$ ) |                            | Burgers' ( $r = 512, n'_t = 40$ ) |                            | Burgers' ( $r = 1024, n'_t = 20$ ) |                            |
| VIT           | 0.5042 $\pm$ 0.0114               | 0.7667 $\pm$ 0.0225        | 2.4269 $\pm$ 0.0288               | 3.7728 $\pm$ 0.0431        | 1.5327 $\pm$ 0.0314                | 2.4093 $\pm$ 0.0408        |
| MLPMIXER      | 0.1973 $\pm$ 0.0070               | 0.2600 $\pm$ 0.0097        | 0.4210 $\pm$ 0.0084               | 0.5844 $\pm$ 0.0101        | 0.3303 $\pm$ 0.0077                | 0.4473 $\pm$ 0.0086        |
| GFN           | 0.2383 $\pm$ 0.0082               | 0.3066 $\pm$ 0.0114        | 0.4187 $\pm$ 0.0079               | 0.5407 $\pm$ 0.0090        | 0.3500 $\pm$ 0.0062                | 0.4489 $\pm$ 0.0081        |
| FNO           | 0.0978 $\pm$ 0.0019               | <b>0.1287</b> $\pm$ 0.0023 | 0.1815 $\pm$ 0.0009               | 0.2410 $\pm$ 0.0011        | <b>0.1430</b> $\pm$ 0.0009         | <b>0.1871</b> $\pm$ 0.0010 |
| NFS           | <b>0.0958</b> $\pm$ 0.0015        | 0.1347 $\pm$ 0.0022        | <b>0.1708</b> $\pm$ 0.0006        | <b>0.2351</b> $\pm$ 0.0009 | 0.1474 $\pm$ 0.0026                | 0.1957 $\pm$ 0.0034        |
|               | KdV ( $r = 512, n'_t = 10$ )      |                            | KdV ( $r = 512, n'_t = 40$ )      |                            | KdV ( $r = 1024, n'_t = 20$ )      |                            |
| VIT           | 0.2066 $\pm$ 0.0027               | 0.3525 $\pm$ 0.0049        | 0.2376 $\pm$ 0.0022               | 0.5521 $\pm$ 0.0036        | 0.1897 $\pm$ 0.0003                | 0.3725 $\pm$ 0.0009        |
| MLPMIXER      | 0.2152 $\pm$ 0.0023               | 0.3686 $\pm$ 0.0039        | <b>0.2497</b> $\pm$ 0.0017        | 0.5400 $\pm$ 0.0029        | 0.2062 $\pm$ 0.0007                | 0.4429 $\pm$ 0.0012        |
| GFN           | 0.1530 $\pm$ 0.0004               | 0.2607 $\pm$ 0.0006        | 0.2691 $\pm$ 0.0007               | 0.5451 $\pm$ 0.0014        | 0.1984 $\pm$ 0.0002                | 0.3869 $\pm$ 0.0003        |
| FNO           | 0.3230 $\pm$ 0.0035               | 1.1105 $\pm$ 0.0061        | 0.9605 $\pm$ 0.0024               | 2.7500 $\pm$ 0.0055        | 0.5929 $\pm$ 0.0020                | 1.6473 $\pm$ 0.0033        |
| NFS           | <b>0.0678</b> $\pm$ 0.0002        | <b>0.1214</b> $\pm$ 0.0003 | 0.2709 $\pm$ 0.0009               | <b>0.5122</b> $\pm$ 0.0013 | <b>0.1576</b> $\pm$ 0.0003         | <b>0.3114</b> $\pm$ 0.0005 |
|               | NS ( $r = 64, n'_t = 10$ )        |                            | NS ( $r = 64, n'_t = 40$ )        |                            | NS ( $r = 128, n'_t = 20$ )        |                            |
| VIT           | 3.9609 $\pm$ 0.0101               | 6.0575 $\pm$ 0.0250        | 12.3433 $\pm$ 0.0342              | 16.5238 $\pm$ 0.0415       | 9.3010 $\pm$ 0.0234                | 14.0027 $\pm$ 0.0380       |
| MLPMIXER      | 3.1530 $\pm$ 0.0049               | 4.4339 $\pm$ 0.0067        | 7.9291 $\pm$ 0.0038               | 10.4149 $\pm$ 0.0066       | 7.7410 $\pm$ 0.0037                | 10.1934 $\pm$ 0.0082       |
| GFN           | 1.7396 $\pm$ 0.0016               | 2.3551 $\pm$ 0.0028        | 5.4464 $\pm$ 0.0023               | 7.2130 $\pm$ 0.0032        | 3.1261 $\pm$ 0.0026                | 4.1691 $\pm$ 0.0047        |
| FNO           | 2.4076 $\pm$ 0.0017               | 3.2861 $\pm$ 0.0024        | 7.6979 $\pm$ 0.0035               | 10.6401 $\pm$ 0.0056       | 3.7001 $\pm$ 0.0034                | 5.0047 $\pm$ 0.0072        |
| NFS           | <b>0.8636</b> $\pm$ 0.0008        | <b>1.2264</b> $\pm$ 0.0011 | <b>3.1122</b> $\pm$ 0.0020        | <b>4.1950</b> $\pm$ 0.0037 | <b>1.8406</b> $\pm$ 0.0003         | <b>2.5620</b> $\pm$ 0.0005 |

Table B6: Performance comparison with graph spatio-temporal benchmarks ( $n_t = 1$ ).

| Graph Spatio-Temporal Models | MAE ( $\times 10^{-3}$ )            | RMSE ( $\times 10^{-3}$ )   | MAE ( $\times 10^{-3}$ )            | RMSE ( $\times 10^{-3}$ )   | MAE ( $\times 10^{-3}$ )            | RMSE ( $\times 10^{-3}$ )   |
|------------------------------|-------------------------------------|-----------------------------|-------------------------------------|-----------------------------|-------------------------------------|-----------------------------|
|                              | Burgers' ( $n_s = 512, n'_t = 10$ ) |                             | Burgers' ( $n_s = 256, n'_t = 20$ ) |                             | Burgers' ( $n_s = 512, n'_t = 40$ ) |                             |
| DCRNN                        | 277.8393 $\pm$ 0.0082               | 346.1716 $\pm$ 0.0088       | 292.1712 $\pm$ 0.0280               | 368.1883 $\pm$ 0.0204       | 298.4096 $\pm$ 0.0137               | 373.0938 $\pm$ 0.0186       |
| AGCRN                        | 289.9780 $\pm$ 0.0001               | 360.9834 $\pm$ 0.0001       | 272.6697 $\pm$ 0.3404               | 340.1351 $\pm$ 0.5435       | 305.4976 $\pm$ 0.2120               | 376.0804 $\pm$ 0.2385       |
| GCGRU                        | 288.4507 $\pm$ 0.0246               | 361.1175 $\pm$ 0.0512       | 294.9075 $\pm$ 0.0005               | 367.4703 $\pm$ 0.0004       | 291.0365 $\pm$ 0.0265               | 365.1668 $\pm$ 0.0827       |
| MPPDE                        | 24.4997 $\pm$ 0.0014                | 34.5123 $\pm$ 0.0017        | 25.4357 $\pm$ 0.0002                | 31.7015 $\pm$ 0.0002        | 25.3311 $\pm$ 0.0004                | 33.7808 $\pm$ 0.0005        |
| NFS                          | <b>16.1860</b> $\pm$ 0.0016         | <b>28.1504</b> $\pm$ 0.0021 | <b>21.1634</b> $\pm$ 0.0018         | <b>33.8976</b> $\pm$ 0.0018 | <b>26.0818</b> $\pm$ 0.0001         | <b>44.7962</b> $\pm$ 0.0003 |
| <hr/>                        |                                     |                             |                                     |                             |                                     |                             |
|                              | KdV ( $n_s = 512, n'_t = 10$ )      |                             | KdV ( $n_s = 256, n'_t = 20$ )      |                             | KdV ( $r = 512, n'_t = 40$ )        |                             |
|                              |                                     |                             |                                     |                             |                                     |                             |
| DCRNN                        | 1.6855 $\pm$ 0.0001                 | 3.0875 $\pm$ 0.0001         | 3.1267 $\pm$ 0.0001                 | 4.8662 $\pm$ 0.0001         | 5.7387 $\pm$ 0.0001                 | 8.3752 $\pm$ 0.0001         |
| AGCRN                        | 4.0753 $\pm$ 0.0001                 | 6.8943 $\pm$ 0.0001         | 5.4107 $\pm$ 0.0001                 | 9.2333 $\pm$ 0.0001         | 8.4438 $\pm$ 0.0001                 | 13.8677 $\pm$ 0.0001        |
| GCGRU                        | 1.6554 $\pm$ 0.0001                 | 2.6839 $\pm$ 0.0001         | 3.0677 $\pm$ 0.0001                 | 4.6557 $\pm$ 0.0001         | 5.8745 $\pm$ 0.0001                 | 9.4528 $\pm$ 0.0001         |
| MPPDE                        | 1.5452 $\pm$ 0.0001                 | 2.6774 $\pm$ 0.0001         | 2.9929 $\pm$ 0.0007                 | 5.4582 $\pm$ 0.0010         | 3.0101 $\pm$ 0.0001                 | 4.9946 $\pm$ 0.0001         |
| NFS                          | <b>0.0816</b> $\pm$ 0.0012          | <b>0.1512</b> $\pm$ 0.0022  | <b>0.1576</b> $\pm$ 0.0007          | <b>0.3114</b> $\pm$ 0.0018  | <b>0.3210</b> $\pm$ 0.0021          | <b>0.6873</b> $\pm$ 0.0049  |
| <hr/>                        |                                     |                             |                                     |                             |                                     |                             |
|                              | NS ( $n_s = 4096, n'_t = 10$ )      |                             | NS ( $n_s = 1024, n'_t = 20$ )      |                             | NS ( $n_s = 4096, n'_t = 40$ )      |                             |
|                              |                                     |                             |                                     |                             |                                     |                             |
| DCRNN                        | 30.6756 $\pm$ 0.0001                | 41.7815 $\pm$ 0.0001        | 52.1290 $\pm$ 0.0138                | 69.7019 $\pm$ 0.0032        | 88.3382 $\pm$ 0.0864                | 119.5021 $\pm$ 0.0055       |
| AGCRN                        | OOM                                 | OOM                         | 59.9393 $\pm$ 0.0001                | 79.0434 $\pm$ 0.0001        | OOM                                 | OOM                         |
| GCGRU                        | 28.8537 $\pm$ 0.0019                | 40.1215 $\pm$ 0.0008        | 49.9352 $\pm$ 0.0028                | 67.5623 $\pm$ 0.0014        | 85.9303 $\pm$ 0.0731                | 117.9925 $\pm$ 0.0172       |
| MPPDE                        | 8.9810 $\pm$ 0.0014                 | 12.1595 $\pm$ 0.0022        | 20.7453 $\pm$ 0.0008                | 32.1098 $\pm$ 0.0018        | 54.2387 $\pm$ 0.0006                | 90.0190 $\pm$ 0.0007        |
| NFS                          | <b>2.1992</b> $\pm$ 0.0021          | <b>2.8280</b> $\pm$ 0.0033  | <b>3.9178</b> $\pm$ 0.0054          | <b>5.0182</b> $\pm$ 0.0080  | <b>4.7865</b> $\pm$ 0.0042          | <b>6.1384</b> $\pm$ 0.0069  |

Table B7: Performance comparison with graph spatio-temporal benchmarks ( $n_t = 10$ ).

| Graph Spatio-Temporal Models | MAE ( $\times 10^{-3}$ )            | RMSE ( $\times 10^{-3}$ )  | MAE ( $\times 10^{-3}$ )            | RMSE ( $\times 10^{-3}$ )  | MAE ( $\times 10^{-3}$ )            | RMSE ( $\times 10^{-3}$ )  |
|------------------------------|-------------------------------------|----------------------------|-------------------------------------|----------------------------|-------------------------------------|----------------------------|
|                              | Burgers' ( $n_s = 512, n'_t = 10$ ) |                            | Burgers' ( $n_s = 256, n'_t = 20$ ) |                            | Burgers' ( $n_s = 512, n'_t = 40$ ) |                            |
| DCRNN                        | 2.6122 $\pm$ 0.0014                 | 3.8435 $\pm$ 0.0019        | 4.6126 $\pm$ 0.0015                 | 6.8853 $\pm$ 0.0033        | 8.5880 $\pm$ 0.0020                 | 12.7394 $\pm$ 0.0037       |
| AGCRN                        | 4.6667 $\pm$ 0.0001                 | 6.2791 $\pm$ 0.0001        | 10.4900 $\pm$ 0.0009                | 13.9810 $\pm$ 0.0022       | 15.6143 $\pm$ 0.0002                | 21.0937 $\pm$ 0.0001       |
| GCGRU                        | 1.6643 $\pm$ 0.0002                 | 2.5074 $\pm$ 0.0003        | 3.1400 $\pm$ 0.0010                 | 4.8008 $\pm$ 0.0019        | 5.7653 $\pm$ 0.0021                 | 8.9335 $\pm$ 0.0028        |
| MPPDE                        | 1.1271 $\pm$ 0.0004                 | 1.8838 $\pm$ 0.0007        | 2.4554 $\pm$ 0.0003                 | 4.4315 $\pm$ 0.0006        | 4.1213 $\pm$ 0.0006                 | 6.1980 $\pm$ 0.0009        |
| NFS                          | <b>0.1085</b> $\pm$ 0.0016          | <b>0.1504</b> $\pm$ 0.0021 | <b>0.1634</b> $\pm$ 0.0018          | <b>0.2328</b> $\pm$ 0.0018 | <b>0.1983</b> $\pm$ 0.0001          | <b>0.2775</b> $\pm$ 0.0003 |
| <hr/>                        |                                     |                            |                                     |                            |                                     |                            |
|                              | KdV ( $n_s = 512, n'_t = 10$ )      |                            | KdV ( $n_s = 256, n'_t = 20$ )      |                            | KdV ( $r = 512, n'_t = 40$ )        |                            |
|                              |                                     |                            |                                     |                            |                                     |                            |
| DCRNN                        | 2.3196 $\pm$ 0.0001                 | 4.1634 $\pm$ 0.0001        | 3.4503 $\pm$ 0.0005                 | 5.7450 $\pm$ 0.0003        | 4.9286 $\pm$ 0.0010                 | 8.3912 $\pm$ 0.0008        |
| AGCRN                        | 3.9350 $\pm$ 0.0001                 | 6.1166 $\pm$ 0.0001        | 5.6631 $\pm$ 0.0001                 | 8.1191 $\pm$ 0.0001        | 8.2893 $\pm$ 0.0002                 | 11.5684 $\pm$ 0.0003       |
| GCGRU                        | 1.6643 $\pm$ 0.0001                 | 2.5074 $\pm$ 0.0001        | 3.4205 $\pm$ 0.0001                 | 5.6873 $\pm$ 0.0001        | 2.5032 $\pm$ 0.0002                 | 5.4515 $\pm$ 0.0003        |
| MPPDE                        | 1.4967 $\pm$ 0.0003                 | 2.6309 $\pm$ 0.0002        | 2.9708 $\pm$ 0.0027                 | 5.3811 $\pm$ 0.0050        | 2.4293 $\pm$ 0.0006                 | 4.9310 $\pm$ 0.0005        |
| NFS                          | <b>0.0816</b> $\pm$ 0.0012          | <b>0.1512</b> $\pm$ 0.0022 | <b>0.1576</b> $\pm$ 0.0007          | <b>0.3114</b> $\pm$ 0.0018 | <b>0.3210</b> $\pm$ 0.0021          | <b>0.6873</b> $\pm$ 0.0049 |
| <hr/>                        |                                     |                            |                                     |                            |                                     |                            |
|                              | NS ( $n_s = 4096, n'_t = 10$ )      |                            | NS ( $n_s = 1024, n'_t = 20$ )      |                            | NS ( $n_s = 4096, n'_t = 40$ )      |                            |
|                              |                                     |                            |                                     |                            |                                     |                            |
| DCRNN                        | 8.7025 $\pm$ 0.0003                 | 12.5238 $\pm$ 0.0002       | 27.1069 $\pm$ 0.0024                | 39.1259 $\pm$ 0.0031       | 59.6602 $\pm$ 0.0177                | 88.2946 $\pm$ 0.0146       |
| AGCRN                        | OOM                                 | OOM                        | 42.4197 $\pm$ 0.0006                | 60.5375 $\pm$ 0.0008       | OOM                                 | OOM                        |
| GCGRU                        | 6.3570 $\pm$ 0.0001                 | 9.7306 $\pm$ 0.0002        | 21.3537 $\pm$ 0.0026                | 32.9674 $\pm$ 0.0033       | 57.2493 $\pm$ 0.0085                | 84.1847 $\pm$ 0.0106       |
| MPPDE                        | 5.4353 $\pm$ 0.0041                 | 7.8838 $\pm$ 0.0037        | 17.5902 $\pm$ 0.0013                | 25.9372 $\pm$ 0.0016       | 42.3057 $\pm$ 0.0066                | 76.3374 $\pm$ 0.0069       |
| NFS                          | <b>0.9335</b> $\pm$ 0.0011          | <b>1.3254</b> $\pm$ 0.0012 | <b>1.8239</b> $\pm$ 0.0012          | <b>2.5291</b> $\pm$ 0.0008 | <b>3.2768</b> $\pm$ 0.0026          | <b>4.3988</b> $\pm$ 0.0009 |

#### B.4 MORE VISUALIZATION

Here we provide more visualization results on the three equations. See Fig. B2, Fig. B3 and Fig. B4.

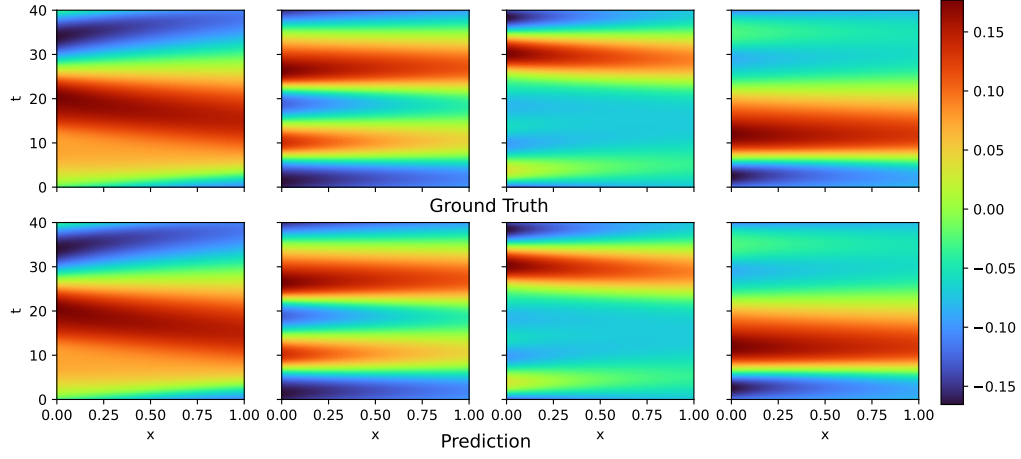

Figure B2: Visualization on equispaced Burgers' equation.

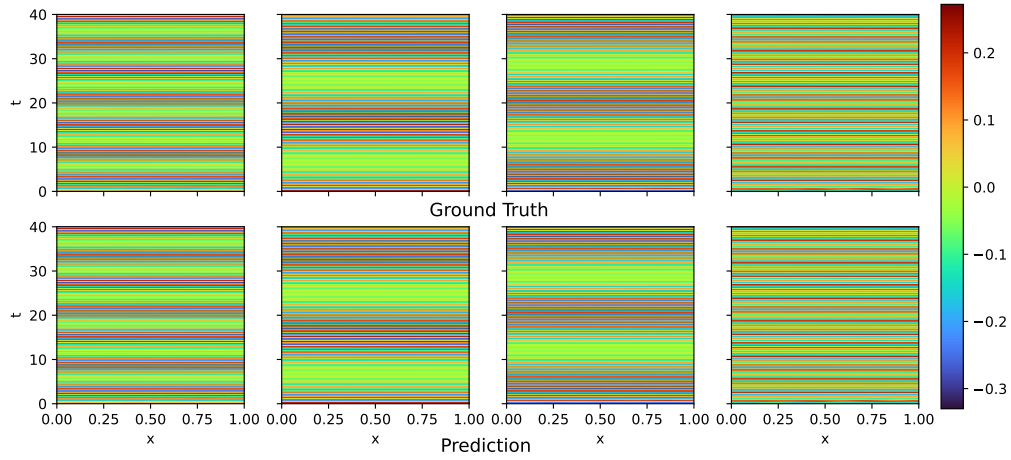

Figure B3: Visualization on equispaced KdV equation.

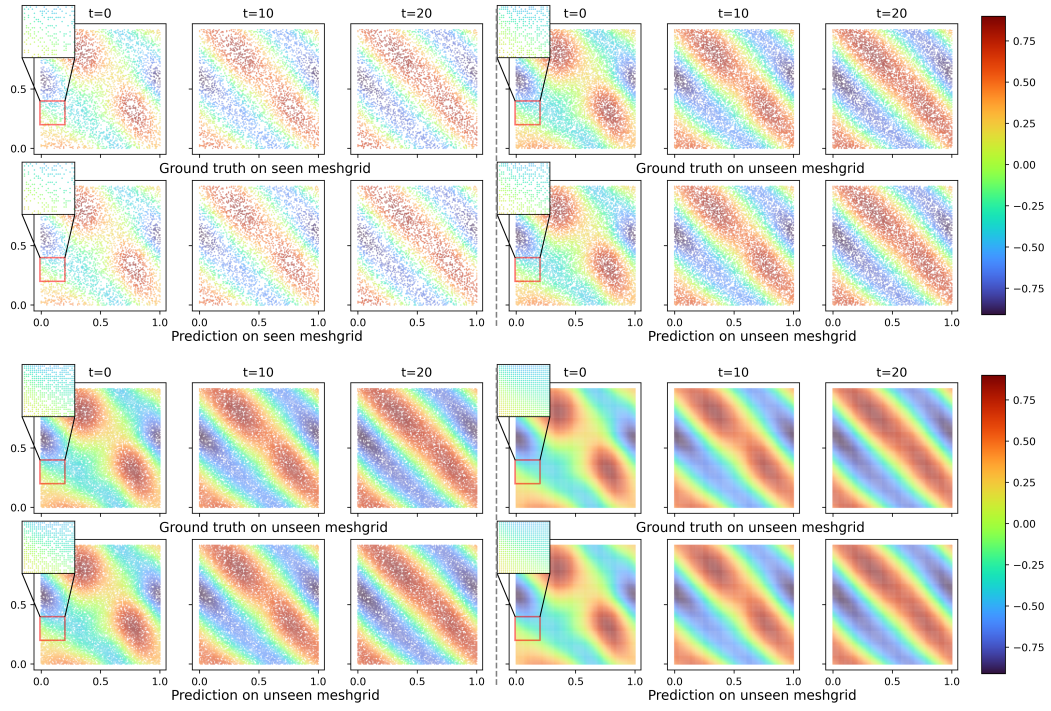

Figure B4: Visualization on non-equispaced NS equation: The training mesh ( $n_s = 4096$  in upper-left) is different from the meshes in inference process ( $n'_s = 8192$  in upper-right,  $n'_s = 12288$  in lower-left and  $n'_s = 16384$  in lower-right).

## B.5 MESH-INVARIANT EVALUATION

Table B8: Mesh-invariant performance of NFS on Burgers' and KdV equations ( $n_t = 10$ ).

|                 | MAE ( $\times 10^{-3}$ )           | RMSE ( $\times 10^{-3}$ ) | MAE ( $\times 10^{-3}$ )           | RMSE ( $\times 10^{-3}$ ) |
|-----------------|------------------------------------|---------------------------|------------------------------------|---------------------------|
|                 | Burgers'                           |                           | KdV                                |                           |
|                 | $(n_s = 512, n_t = 10, n'_t = 40)$ |                           | $(n_s = 512, n_t = 10, n'_t = 40)$ |                           |
| $\mathbf{X}$    | 0.1983 $\pm$ 0.0001                | 0.2775 $\pm$ 0.0002       | 0.3210 $\pm$ 0.0021                | 0.6873 $\pm$ 0.0049       |
| $n'_s = 1.3n_s$ | 0.2371 $\pm$ 0.0034                | 0.3143 $\pm$ 0.0041       | 0.3769 $\pm$ 0.0030                | 0.7805 $\pm$ 0.0077       |
| $n'_s = 1.7n_s$ | 0.2898 $\pm$ 0.0113                | 0.3742 $\pm$ 0.0102       | 0.4084 $\pm$ 0.0072                | 0.8419 $\pm$ 0.0174       |
| $n'_s = 2.0n_s$ | 0.3052 $\pm$ 0.0098                | 0.4180 $\pm$ 0.0100       | 0.4111 $\pm$ 0.0042                | 0.8471 $\pm$ 0.0074       |

Table B9: Performance of NFS with its variants of NS equations ( $n_t = 10$ ) on unseen meshes.

|               | MAE ( $\times 10^{-3}$ )  | RMSE ( $\times 10^{-3}$ ) | MAE ( $\times 10^{-3}$ )  | RMSE ( $\times 10^{-3}$ ) | MAE ( $\times 10^{-3}$ )  | RMSE ( $\times 10^{-3}$ ) |
|---------------|---------------------------|---------------------------|---------------------------|---------------------------|---------------------------|---------------------------|
| Flex + LN     | NS                        |                           | NS                        |                           | NS                        |                           |
|               | $(n_s = 4096, n'_t = 10)$ |                           | $(n_s = 1024, n'_t = 20)$ |                           | $(n_s = 4096, n'_t = 40)$ |                           |
| $\mathbf{X}$  | 0.9335 $\pm$ 0.0011       | 1.3254 $\pm$ 0.0012       | 1.8239 $\pm$ 0.0012       | 2.5291 $\pm$ 0.0008       | 3.2768 $\pm$ 0.0026       | 4.3988 $\pm$ 0.0009       |
| $n'_s = 2n_s$ | 0.9731 $\pm$ 0.0034       | 1.5042 $\pm$ 0.0057       | 2.3530 $\pm$ 0.0051       | 3.3320 $\pm$ 0.0074       | 3.5439 $\pm$ 0.0085       | 4.7904 $\pm$ 0.0168       |
| $n'_s = 3n_s$ | 1.1071 $\pm$ 0.0021       | 1.5716 $\pm$ 0.0038       | 2.5179 $\pm$ 0.0089       | 3.5477 $\pm$ 0.0125       | 3.6584 $\pm$ 0.0180       | 4.8858 $\pm$ 0.0246       |
| $n'_s = 4n_s$ | 1.1015 $\pm$ 0.0000       | 1.5627 $\pm$ 0.0000       | 2.5919 $\pm$ 0.0064       | 3.6526 $\pm$ 0.0071       | 3.6608 $\pm$ 0.0000       | 4.9521 $\pm$ 0.0000       |
|               | MAE ( $\times 10^{-3}$ )  | RMSE ( $\times 10^{-3}$ ) | MAE ( $\times 10^{-3}$ )  | RMSE ( $\times 10^{-3}$ ) | MAE ( $\times 10^{-3}$ )  | RMSE ( $\times 10^{-3}$ ) |
| Gaus + LN     | NS                        |                           | NS                        |                           | NS                        |                           |
|               | $(n_s = 4096, n'_t = 10)$ |                           | $(n_s = 1024, n'_t = 20)$ |                           | $(n_s = 4096, n'_t = 40)$ |                           |
| $\mathbf{X}$  | 1.6341 $\pm$ 0.0034       | 2.1992 $\pm$ 0.0042       | 2.1976 $\pm$ 0.0065       | 3.0219 $\pm$ 0.0090       | 3.6422 $\pm$ 0.0026       | 5.0097 $\pm$ 0.0039       |
| $n'_s = 2n_s$ | 2.8589 $\pm$ 0.0062       | 4.0562 $\pm$ 0.0126       | 3.7465 $\pm$ 0.0041       | 5.1308 $\pm$ 0.0097       | 3.9092 $\pm$ 0.0041       | 5.2402 $\pm$ 0.0075       |
| $n'_s = 3n_s$ | 3.4513 $\pm$ 0.0168       | 4.5199 $\pm$ 0.0377       | 5.7712 $\pm$ 0.0123       | 5.7137 $\pm$ 0.0199       | 4.2102 $\pm$ 0.0082       | 5.5057 $\pm$ 0.0138       |
| $n'_s = 4n_s$ | 3.4357 $\pm$ 0.0000       | 4.7382 $\pm$ 0.0000       | 5.5990 $\pm$ 0.0066       | 5.5958 $\pm$ 0.0049       | 4.2628 $\pm$ 0.0000       | 5.7679 $\pm$ 0.0000       |
|               | MAE ( $\times 10^{-3}$ )  | RMSE ( $\times 10^{-3}$ ) | MAE ( $\times 10^{-3}$ )  | RMSE ( $\times 10^{-3}$ ) | MAE ( $\times 10^{-3}$ )  | RMSE ( $\times 10^{-3}$ ) |
| Flex + LN     | NS                        |                           | NS                        |                           | NS                        |                           |
|               | $(n_s = 4096, n'_t = 10)$ |                           | $(n_s = 1024, n'_t = 20)$ |                           | $(n_s = 4096, n'_t = 40)$ |                           |
| $\mathbf{X}$  | 1.2138 $\pm$ 0.0030       | 1.7293 $\pm$ 0.0047       | 2.5119 $\pm$ 0.0036       | 3.4923 $\pm$ 0.0058       | 4.2083 $\pm$ 0.0037       | 5.6761 $\pm$ 0.0092       |
| $n'_s = 2n_s$ | 1.4882 $\pm$ 0.0146       | 2.1681 $\pm$ 0.0300       | 7.0203 $\pm$ 0.0203       | 10.6096 $\pm$ 0.0345      | 5.8975 $\pm$ 0.0060       | 8.7704 $\pm$ 0.0189       |
| $n'_s = 3n_s$ | 1.6384 $\pm$ 0.0088       | 2.4130 $\pm$ 0.0169       | 7.9177 $\pm$ 0.0059       | 11.9825 $\pm$ 0.0118      | 6.6622 $\pm$ 0.0063       | 9.5874 $\pm$ 0.0131       |
| $n'_s = 4n_s$ | 1.6975 $\pm$ 0.0000       | 2.5008 $\pm$ 0.0000       | 7.1962 $\pm$ 0.0101       | 10.8860 $\pm$ 0.0098      | 6.6951 $\pm$ 0.0000       | 9.6334 $\pm$ 0.0000       |

The mesh-invariant evaluation on Burgers' and KdV Equations of NFS are given in Table. B8. In Table. B8, when the spatial resolution is just 512, inference performance on unseen meshes deteriorates. This result also validate our conclusion (2) in the third paragraph in Sec. 4.

Besides, we give a full evaluation on mesh-invariance of NFS in NS equation, with its variants as a detailed results corresponding to Table. B9.

## B.6 NEIGHBORHOOD SIZE’S EFFECTS

The effects of mean neighborhood size on the predictive performance on Burgers' ( $n_s = 512, n_t = 10, n'_t = 40$ ) and KdV ( $n_s = 512, n_t = 10, n'_t = 40$ ) are shown in Fig. B5.

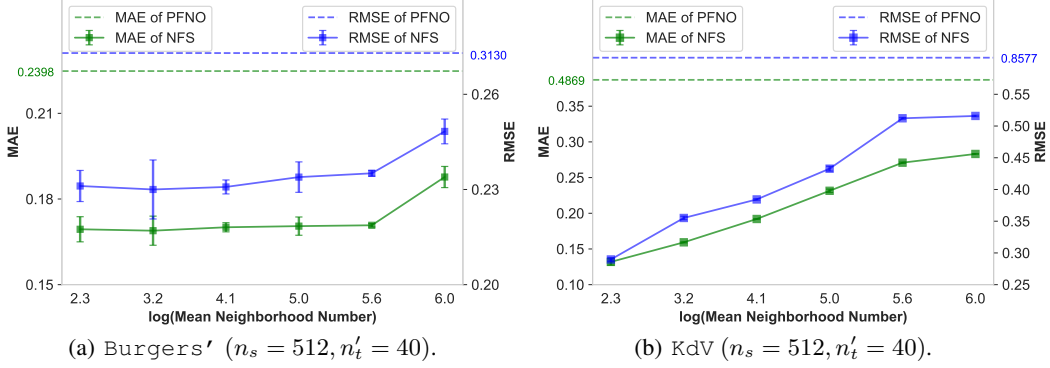

Figure B5: The change of MAE and RMSE of NFS with the increase of neighborhood size on Burgers' ( $n_s = 512, n_t = 10, n'_t = 40$ ) and KdV ( $n_s = 512, n_t = 10, n'_t = 40$ ). PFNO is the baseline.

## B.7 INTERPOLATION WITH OTHER VISION MIXERS

We conduct experiments on non-equispaced NS equations with the combination of our interpolation layers and other Vision Mixers to figure out if they can achieve comparable performance.

Table B10: Performance of different Vision Mixers combined with the interpolation layers in non-equispaced scenarios on NS equations ( $n_t = 10$ ).

|               | MAE ( $\times 10^{-3}$ ) RMSE ( $\times 10^{-3}$ ) |                           | MAE ( $\times 10^{-3}$ ) RMSE ( $\times 10^{-3}$ ) |                           | MAE ( $\times 10^{-3}$ ) RMSE ( $\times 10^{-3}$ ) |                           |
|---------------|----------------------------------------------------|---------------------------|----------------------------------------------------|---------------------------|----------------------------------------------------|---------------------------|
| VIT           | NS<br>( $n_s = 4096, n'_t = 10$ )                  |                           | NS<br>( $n_s = 1024, n'_t = 20$ )                  |                           | NS<br>( $n_s = 4096, n'_t = 40$ )                  |                           |
| $X$           | OOM                                                | OOM                       | OOM                                                | OOM                       | OOM                                                | OOM                       |
|               | MAE ( $\times 10^{-3}$ )                           | RMSE ( $\times 10^{-3}$ ) | MAE ( $\times 10^{-3}$ )                           | RMSE ( $\times 10^{-3}$ ) | MAE ( $\times 10^{-3}$ )                           | RMSE ( $\times 10^{-3}$ ) |
| MLPMIXER      | NS<br>( $n_s = 4096, n'_t = 10$ )                  |                           | NS<br>( $n_s = 1024, n'_t = 20$ )                  |                           | NS<br>( $n_s = 4096, n'_t = 40$ )                  |                           |
| $X$           | 6.1854 $\pm$ 0.0012                                | 8.1556 $\pm$ 0.0018       | 9.4593 $\pm$ 0.0028                                | 12.1316 $\pm$ 0.0022      | 10.1862 $\pm$ 0.0045                               | 13.1548 $\pm$ 0.0051      |
| $n'_s = 2n_s$ | 8.1573 $\pm$ 0.0126                                | 11.2258 $\pm$ 0.0147      | 12.0706 $\pm$ 0.0132                               | 14.9460 $\pm$ 0.0159      | 10.6003 $\pm$ 0.0127                               | 13.6872 $\pm$ 0.0238      |
| $n'_s = 3n_s$ | 8.1952 $\pm$ 0.0088                                | 11.3840 $\pm$ 0.0171      | 14.9910 $\pm$ 0.0094                               | 17.8415 $\pm$ 0.0110      | 10.5633 $\pm$ 0.0140                               | 13.6394 $\pm$ 0.0147      |
| $n'_s = 4n_s$ | 8.7773 $\pm$ 0.0000                                | 11.3313 $\pm$ 0.0000      | 14.9517 $\pm$ 0.0125                               | 17.7857 $\pm$ 0.0199      | 10.5414 $\pm$ 0.0000                               | 13.6106 $\pm$ 0.0000      |
|               | MAE ( $\times 10^{-3}$ )                           | RMSE ( $\times 10^{-3}$ ) | MAE ( $\times 10^{-3}$ )                           | RMSE ( $\times 10^{-3}$ ) | MAE ( $\times 10^{-3}$ )                           | RMSE ( $\times 10^{-3}$ ) |
| GFN           | NS<br>( $n_s = 4096, n'_t = 10$ )                  |                           | NS<br>( $n_s = 1024, n'_t = 20$ )                  |                           | NS<br>( $n_s = 4096, n'_t = 40$ )                  |                           |
| $X$           | 12.2373 $\pm$ 0.0091                               | 16.2902 $\pm$ 0.0133      | 10.2768 $\pm$ 0.0084                               | 13.7852 $\pm$ 0.0078      | 14.7765 $\pm$ 0.0055                               | 19.4872 $\pm$ 0.0106      |
| $n'_s = 2n_s$ | 13.7752 $\pm$ 0.0164                               | 18.3108 $\pm$ 0.0181      | 17.7216 $\pm$ 0.0225                               | 24.1397 $\pm$ 0.0371      | 15.9083 $\pm$ 0.0235                               | 21.0041 $\pm$ 0.0256      |
| $n'_s = 3n_s$ | 13.7054 $\pm$ 0.0122                               | 18.2192 $\pm$ 0.0184      | 17.8238 $\pm$ 0.0112                               | 24.2783 $\pm$ 0.0196      | 15.8986 $\pm$ 0.0156                               | 20.9943 $\pm$ 0.0158      |
| $n'_s = 4n_s$ | 13.7140 $\pm$ 0.0000                               | 18.2271 $\pm$ 0.0000      | 17.8207 $\pm$ 0.0105                               | 24.2833 $\pm$ 0.0141      | 15.8736 $\pm$ 0.0000                               | 20.9772 $\pm$ 0.0000      |

## B.8 COMPLEXITY COMPARISON

We here first give Table. B11 to show the complexity of time and memory of all the evaluated methods on NS ( $r = 64, n_t = 10, n'_t = 40$ ).

Table B11: comparison on complexity of the evaluated methods

| Type                        | Methods  | Time/Epoch | Peak Memory | Parameter Number |
|-----------------------------|----------|------------|-------------|------------------|
| Graph Spatio-Temporal Model | GCGRU    | 6'18"      | 8660MB      | 74945            |
|                             | DCRNN    | 9'38"      | 11120MB     | 148673           |
|                             | AGCRN    | OOM        | OOM         | OOM              |
|                             | MPPDE    | 10'54"     | 23333MB     | 622161           |
| Vision Mixer                | VIT      | 3'14"      | 32166MB     | 773217           |
|                             | MLPMIXER | 1'12"      | 4421MB      | 79749953         |
|                             | GFN      | 48"        | 3296MB      | 1361729          |
|                             | FNO      | 27"        | 3748MB      | 6299425          |
|                             | PFNO     | 43"        | 3380MB      | 9742145          |
|                             | NFS      | 2'02"      | 31938MB     | 37891937         |

Table B12: Detailed complexity of NFS

| Interpolation on Resampled Points     |                    |                    |
|---------------------------------------|--------------------|--------------------|
| Neighbor Searching                    | Kernel Calculation | Weighted Summation |
| 3522MB                                | 3102MB             | 6884MB             |
| Interpolation back on Original Points |                    |                    |
| Neighbor Searching                    | Kernel Calculation | Weighted Summation |
| 2506MB                                | 2754MB             | 6884MB             |

It demonstrates that our method has comparable efficiency as Vision Mixers. For the graph spatial-temporal models, they suffer from the recurrent network structure, and thus is extremely time-consuming while the parameter number is small, limiting their flexibility.

**Time.** However, once we compare the used time in PFNO and NFS, we will find that the interpolation layers are considerably time-consuming. Another module that cost time complexity is the normalization layer, as the original FNO does not include Layer-Norm in its architecture, but it is stacked in PFNO. Theoretically, PFNO handles a down-sampled grids in a low resolution, because of the patchwise embedding. However, it takes more time than FNO. Therefore, we conclude that the time complexity brought from Layer-Norm is very significant, but it is affordable because of the performance improvements.

**Memory.** Besides, the operation of searching for each spatial points' neighborhood and calculating weighted summation in Eq. (9) and Eq. (10) are very memory-consuming. We test it on the same experiment, and give the memory usage of different models in forward process, as shown in Table. B12. The memory cost in backward process is 6902MB.
